# Supplementary material for: Evaluating the Economic Impact of Smart Care Platforms: Qualitative and Quantitative Results of a Case Study
Source: PubMed Central journal article supplement (PMC5108925; doi:10.2196/medinform.5012), 2016-10-31
Supplement: medinform_v4i4e33_app1.pdf [file medinform_v4i4e33_app1.pdf]

## Multimedia Appendix 1: Current process breakdown

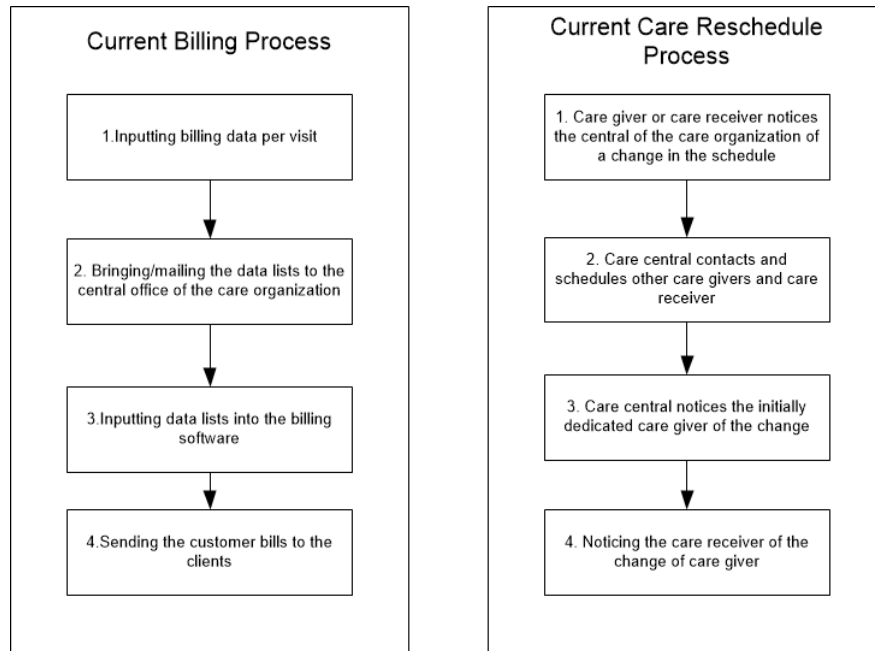

In following two tables a concise overview of the data is presented. All data was validated by experts involved in the OCCS project.

**Table 1: Overview of the data for the current billing process**

| Description data parameter                                                                           | Value | Unit             |
|------------------------------------------------------------------------------------------------------|-------|------------------|
| Time needed for inputting data per visit                                                             | 2     | min/visit        |
| # visits per month per FTE                                                                           | 62    | visits/month     |
| Frequency of data list delivery by the care provider to the care organization                        | 12    | deliveries/year  |
| Cost of envelopes to send the lists                                                                  | 12    | euro/year        |
| Time needed for inputting one line of the data list into the back end system                         | 0.31  | Min/data line    |
| # care givers in 'Interregio Gent' (full time + part time)                                           | 1719  | Persons          |
| Full Time equivalent of the total amount of care givers                                              | 881   | FTEs             |
| Total amount of data lines inputted in the backend system by the central administration (March 2014) | 88000 | data lines/month |
| % rework due to mistakes in inputting                                                                | 4%    | of # data        |

**Table 2: Overview of the data for the current rescheduling process**

| Description data parameter                                                                      | Value | Unit                        |
|-------------------------------------------------------------------------------------------------|-------|-----------------------------|
| Time needed by the care receiver or care provider to inform the care central                    | 1.5   | min/call                    |
| Telco costs needed to inform the care central (in case the care provider calls with own mobile) | 0.5   | euro/call                   |
| chance that that a visit needs to be rescheduled                                                | 15%   | Of planned                  |
| # visits per month per FTE                                                                      | 62    | visits/month                |
| Chance that it the care receiver informs the care central him/herself                           | 70%   |                             |
| Time needed to inform other care provider                                                       | 1     | min/contacted care provider |
| Costs Telco for the care administration                                                         | 0.01  | euro/min                    |
| Average amount of care actors to contact (number of calls to make)                              | 4     |                             |

|                                           |   |     |
|-------------------------------------------|---|-----|
| time needed to make the new care schedule | 4 | Min |
|-------------------------------------------|---|-----|

Based on these inputs, the model provides following results on current resource usages:

**Table 3: Resource usages for the current billing process**

| <i>Description data parameter</i>                                                                                        | <i>Value</i> | <i>unit</i> |
|--------------------------------------------------------------------------------------------------------------------------|--------------|-------------|
| Total time needed per FTE when inputting billing data when he is with the care receiver (time is paid by care receiver)  | 1488         | min/year    |
| Total time needed for the care administration to put in all the billing data of the care givers into the back end system | 339120       | min/year    |
| Costs for the care administration to put in all the billing data of the care givers into the back end system             | 96084        | euro/year   |
| Costs to provide each care provider with 12 envelopes to send the data lists once a month                                | 20628        | euro/year   |
| Total cost for the care organization caused by the current billing process                                               | 116712       | euro/year   |

**Table 4: Resource usages for the current care rescheduling process**

| <i>Description data parameter</i>                                                                                                                                       | <i>Value</i> | <i>unit</i> |
|-------------------------------------------------------------------------------------------------------------------------------------------------------------------------|--------------|-------------|
| Total time needed per care provider to contact and discuss the new care schedule with the permanency station (central office)                                           | 496          | min/year    |
| Total cost of wages for the care organization to pay for the time needed of each care provider to contact and discuss the new care schedule with the permanency station | 119180       | euro/year   |
| Total costs for compensating the telecommunication cost of the care providers when they called with their own device to the care central                                | 14748        | euro/year   |
| Total telecommunication costs for the permanency station due to calling to the care providers (central office)                                                          | 6292         | euro/year   |
| Total cost for the wages of the people of the permanency station (central office)                                                                                       | 264644       | euro/year   |
| Total cost for the care organization caused by the current care rescheduling process                                                                                    | 397981       | euro/year   |

**Table 5: Total cost of current billing and care rescheduling processes**

|                                                                                      |        |           |
|--------------------------------------------------------------------------------------|--------|-----------|
| Total cost for the care organization caused by the current billing process           | 116712 | euro/year |
| Total cost for the care organization caused by the current care rescheduling process | 397981 | euro/year |
| Total cost of the current billing and rescheduling processes                         | 514693 | euro/year |

Next to high costs for the processes we notice from the table 13 that all the clients in total pay for about 22000 hours (1488 min/year per FTE x 881 FTEs) per year for filling in the billing data.
